# Supplementary material for: Physical activity during pregnancy and association with changes in fat mass and adipokines in women of normal-weight or with obesity
Source: PubMed Central journal article supplement (PMC8206069; doi:10.1038/s41598-021-91980-z), 2021-06-15
Supplement: 41598_2021_91980_MOESM1_ESM.pdf [file 41598_2021_91980_MOESM1_ESM.pdf]

**Supplemental Material for:**

**Physical activity during pregnancy and association with changes in fat mass and adipokines in women of normal-weight or with obesity**

Ulrika Andersson-Hall<sup>1</sup>, Hanna de Maré<sup>1</sup>, Freja Askeli<sup>1</sup>, Mats Börjesson<sup>2,3,4</sup>, Agneta Holmäng<sup>1</sup>

<sup>1</sup>Institute of Neuroscience and Physiology, Department of Physiology, Sahlgrenska Academy, University of Gothenburg, 405 30 Gothenburg, Sweden

<sup>2</sup> Centre for Health and Performance, Department of Food and Nutrition, and Sport Science, University of Gothenburg, Gothenburg, Sweden.

<sup>3</sup>Department of Acute and Molecular Medicine, Institute of Medicine, Sahlgrenska Academy, University of Gothenburg, Gothenburg, Sweden

<sup>4</sup>Dept of MGA, Sahlgrenska University Hospital, Region of Västra Götaland, Gothenburg, Sweden

**Corresponding author:** Ulrika Andersson Hall, Institute of Neuroscience and Physiology, Box 432, Sahlgrenska Academy, University of Gothenburg, 405 30 Gothenburg, Sweden.

E-mail: [ulrika.andersson.hall@gu.se](mailto:ulrika.andersson.hall@gu.se)

**Table S1.** Failure analysis of women not included for sOB-R analysis.

|                          | <b>NW women</b>      |                          |          | <b>OB women</b>      |                          |          |
|--------------------------|----------------------|--------------------------|----------|----------------------|--------------------------|----------|
|                          | Included in analysis | Not included in analysis | <i>p</i> | Included in analysis | Not included in analysis | <i>p</i> |
| <i>T1 values</i>         |                      |                          |          |                      |                          |          |
| BMI (kg/m <sup>2</sup> ) | 22.2 ± 1.5           | 21.9 ± 1.4               | 0.26     | 34.4 ± 4.0           | 34.4 ± 3.8               | 0.94     |
| Fat Mass (kg)            | 17.0 ± 4.3           | 16.2 ± 3.9               | 0.30     | 46.2 ± 10.8          | 47.4 ± 10.0              | 0.71     |
| Leptin (ng/ml)           | 13.6 ± 6.9           | 11.6 ± 5.4               | 0.12     | 49.0 ± 16.3          | 55.9 ± 22.2              | 0.33     |
| Adiponectin (ug/ml)      | 18.3 ± 7.6           | 16.1 ± 6.8               | 0.14     | 11.3 ± 5.4           | 10.6 ± 6.3               | 0.77     |
| <i>T1 to T3 change</i>   |                      |                          |          |                      |                          |          |
| Body Weight (kg)         | 11.6 ± 3.1           | 11.1 ± 2.4               | 0.30     | 7.8 ± 4.8            | 7.8 ± 3.4                | 0.99     |
| Fat Mass (kg)            | 4.8 ± 3.1            | 4.3 ± 2.3                | 0.36     | 1.2 ± 3.8            | 0.9 ± 3.8                | 0.83     |
| Leptin (ng/ml)           | 7.4 ± 11.6           | 6.3 ± 9.5                | 0.61     | 7.6 ± 22.9           | 3.3 ± 13.4               | 0.48     |
| Adiponectin (ug/ml)      | -4.5 ± 6.1           | -1.9 ± 10.2              | 0.09     | -1.4 ± 3.9           | 0.7 ± 5.4                | 0.21     |

Significance determined with unadjusted t-test. NW, women of normal weight; OB, women with obesity

**Table S2.** Spearman correlation between metabolic parameters at the start of pregnancy with training reported for the prior 12 months.

|                          | Activity level Leisure |          | Activity level Work |          | Walk/Low Impact training (n) |          | Cardiovascular training (n) |              | Strength training (n) |              |
|--------------------------|------------------------|----------|---------------------|----------|------------------------------|----------|-----------------------------|--------------|-----------------------|--------------|
|                          | Rho                    | <i>p</i> | Rho                 | <i>p</i> | Rho                          | <i>p</i> | Rho                         | <i>p</i>     | Rho                   | <i>p</i>     |
| <i>NW</i>                |                        |          |                     |          |                              |          |                             |              |                       |              |
| BMI (kg/m <sup>2</sup> ) | 0.022                  | 0.799    | -0.005              | 0.958    | 0.058                        | 0.509    | 0.064                       | 0.467        | 0.044                 | 0.615        |
| Fat Mass (kg)            | -0.104                 | 0.233    | -0.001              | 0.990    | 0.095                        | 0.278    | -0.047                      | 0.589        | -0.021                | 0.811        |
| Leptin (ng/ml)           | -0.083                 | 0.378    | 0.156               | 0.097    | 0.147                        | 0.120    | -0.175                      | 0.063        | -0.092                | 0.335        |
| sOB-R (ng/ml)            | 0.194                  | 0.078    | -0.005              | 0.964    | 0.101                        | 0.369    | 0.013                       | 0.906        | 0.069                 | 0.540        |
| Adiponectin (ug/ml)      | 0.025                  | 0.787    | -0.058              | 0.539    | 0.069                        | 0.470    | 0.052                       | 0.579        | -0.071                | 0.453        |
| <i>OB</i>                |                        |          |                     |          |                              |          |                             |              |                       |              |
| BMI (kg/m <sup>2</sup> ) | 0.142                  | 0.324    | -0.061              | 0.673    | -0.066                       | 0.648    | -0.230                      | 0.108        | 0.077                 | 0.594        |
| Fat Mass (kg)            | 0.040                  | 0.785    | -0.060              | 0.682    | -0.164                       | 0.259    | -0.137                      | 0.349        | -0.033                | 0.822        |
| Leptin (ng/ml)           | -0.234                 | 0.140    | 0.183               | 0.252    | -0.004                       | 0.982    | -0.182                      | 0.255        | -0.209                | 0.189        |
| sOB-R (ng/ml)            | 0.277                  | 0.118    | 0.034               | 0.851    | -0.067                       | 0.712    | <b>0.379</b>                | <b>0.030</b> | <b>0.373</b>          | <b>0.032</b> |
| Adiponectin (ug/ml)      | 0.145                  | 0.367    | 0.228               | 0.152    | -0.004                       | 0.979    | -0.011                      | 0.944        | 0.041                 | 0.800        |

Spearman correlation between self-reported physical activity data and metabolic measurements. NW, women of normal weight; OB, women with obesity.

**Table S3.** Change in weight, fat mass and adipokines from first to last trimester depending on whether the women reported any *walk or low impact exercise* at their visits in trimesters 2 and 3.

|             | Training reported in trimester 2 |             |          |                        | Training reported in trimester 3 |             |          |                        |
|-------------|----------------------------------|-------------|----------|------------------------|----------------------------------|-------------|----------|------------------------|
|             | Yes                              | No          | <i>p</i> | <i>p<sup>adj</sup></i> | Yes                              | No          | <i>p</i> | <i>p<sup>adj</sup></i> |
| <i>NW</i>   | <i>n=64</i>                      | <i>n=70</i> |          |                        | <i>n=66</i>                      | <i>n=69</i> |          |                        |
| Body Weight | 11.4 ± 3.3                       | 11.4 ± 2.5  | 0.91     | 0.58                   | 11.6 ± 3.4                       | 11.2 ± 2.4  | 0.49     | 0.61                   |
| Fat Mass    | 4.6 ± 3.0                        | 4.6 ± 2.7   | 0.91     | 0.54                   | 4.5 ± 3.1                        | 4.7 ± 2.5   | 0.74     | 0.53                   |
| Leptin      | 6.0 ± 12.4                       | 8.0 ± 9.8   | 0.36     | 0.11                   | 6.8 ± 12.0                       | 7.5 ± 10.3  | 0.75     | 0.33                   |
| sOB-R*      | 13.9 ± 14.5                      | 13.8 ± 16.3 | 0.99     | 0.99                   | 12.4 ± 14.4                      | 15.5 ± 16.5 | 0.37     | 0.49                   |
| Adiponectin | -4.4 ± 7.2                       | -3.3 ± 8.1  | 0.44     | 0.68                   | -4.9 ± 4.8                       | -2.7 ± 9.4  | 0.12     | 0.22                   |
| <i>OB</i>   | <i>n=18</i>                      | <i>n=32</i> |          |                        | <i>n=20</i>                      | <i>n=30</i> |          |                        |
| Body Weight | 6.7 ± 4.1                        | 8.5 ± 4.4   | 0.18     | 0.12                   | 7.2 ± 4.2                        | 8.2 ± 4.4   | 0.42     | 0.27                   |
| Fat Mass    | 0.5 ± 3.3                        | 1.5 ± 4.0   | 0.36     | 0.67                   | 0.8 ± 3.5                        | 1.3 ± 3.9   | 0.70     | 0.77                   |
| Leptin      | 0.7 ± 13.3                       | 5.9 ± 16.4  | 0.31     | 0.43                   | 3.9 ± 17.0                       | 4.3 ± 14.8  | 0.94     | 0.56                   |
| sOB-R*      | 10.8 ± 8.6                       | 8.9 ± 5.0   | 0.51     | 0.82                   | 12.0 ± 8.7                       | 8.2 ± 4.4   | 0.18     | 0.23                   |
| Adiponectin | -0.9 ± 4.6                       | -1.1 ± 4.2  | 0.88     | 0.74                   | -0.1 ± 4.1                       | -1.5 ± 4.3  | 0.30     | 0.44                   |

Significance determined with unadjusted t-test (*p*) or ANCOVA adjusted for age, BMI in trimester 1, parity and education (*p<sup>adj</sup>*). Δ denotes the gestational change from trimester 1 to trimester 3. \*sOB-R analysis was made on a subset of women; n= 84 for NW (n=42/42 for yes/no in trimester 2 and n=43/40 in trimester 3) and n=33 for OB (n=12/21 for yes/no in trimester 2 and n=12/21 in trimester 3). NW, women of normal weight; OB, women with obesity

**Table S4.** Change in weight, fat mass and adipokines from first to last trimester depending on whether the women reported any *aerobic exercise* at their visits in trimesters 2 and 3.

|             | Training reported in trimester 2 |                    |              |                         | Training reported in trimester 3 |                    |          |                         |
|-------------|----------------------------------|--------------------|--------------|-------------------------|----------------------------------|--------------------|----------|-------------------------|
|             | Yes<br><i>n</i> =44              | No<br><i>n</i> =90 | <i>p</i>     | <i>p</i> <sup>adj</sup> | Yes<br><i>n</i> =39              | No<br><i>n</i> =96 | <i>p</i> | <i>p</i> <sup>adj</sup> |
| <i>NW</i>   |                                  |                    |              |                         |                                  |                    |          |                         |
| Body Weight | 10.9 ± 2.8                       | 11.7 ± 2.9         | 0.14         | 0.22                    | 11.2 ± 3.1                       | 11.5 ± 2.8         | 0.64     | 0.18                    |
| Fat Mass    | 4.2 ± 3.1                        | 4.8 ± 2.7          | 0.24         | 0.27                    | 4.7 ± 2.8                        | 4.5 ± 2.8          | 0.70     | 0.81                    |
| Leptin      | 4.6 ± 7.7                        | 8.3 ± 12.1         | 0.05         | 0.14                    | 6.5 ± 12.0                       | 7.5 ± 10.6         | 0.67     | 0.21                    |
| sOB-R       | <b>18.7 ± 18.3</b>               | <b>11.3 ± 13.0</b> | <b>0.03</b>  | <b>0.03</b>             | 15.1 ± 16.6                      | 13.1 ± 14.8        | 0.57     | 0.34                    |
| Adiponectin | -5.0 ± 4.5                       | -3.2 ± 8.8         | 0.23         | 0.36                    | -4.0 ± 5.1                       | -3.6 ± 8.7         | 0.78     | 0.81                    |
| <i>OB</i>   |                                  |                    |              |                         |                                  |                    |          |                         |
| Body Weight | 7.3 ± 5.2                        | 8.0 ± 4.1          | 0.65         | 0.83                    | 6.7 ± 4.4                        | 8.1 ± 4.3          | 0.37     | 0.38                    |
| Fat Mass    | 1.4 ± 4.4                        | 1.0 ± 3.6          | 0.76         | 0.81                    | -0.4 ± 3.2                       | 1.5 ± 3.8          | 0.16     | 0.18                    |
| Leptin      | 6.6 ± 12.3                       | 3.4 ± 16.3         | 0.60         | 0.61                    | 4.4 ± 9.5                        | 4.1 ± 16.9         | 0.96     | 0.61                    |
| sOB-R       | <b>15.2 ± 7.0</b>                | <b>7.8 ± 5.3</b>   | <b>0.003</b> | <b>0.01</b>             | 11.8 ± 8.8                       | 8.8 ± 5.4          | 0.24     | 0.18                    |
| Adiponectin | <b>1.7 ± 4.9</b>                 | <b>-1.8 ± 3.8</b>  | <b>0.03</b>  | <b>0.02</b>             | -0.2 ± 5.1                       | -1.2 ± 4.0         | 0.55     | 0.37                    |

Significance determined with unadjusted t-test (*p*) or ANCOVA adjusted for age, BMI in trimester 1, parity and education (*p*<sup>adj</sup>). Δ denotes the gestational change from trimester 1 to trimester 3 \*sOB-R analysis was made on a subset of women; *n* = 84 for NW (*n* = 29/55 for yes/no in trimester 2 and *n* = 32/51 in trimester 3) and *n* = 33 for OB (*n* = 8/25 for yes/no in trimester 2 and *n* = 9/24 in trimester 3). NW, women of normal weight; OB, women with obesity

**Table S5.** Change in weight, fat mass and adipokines from first to last trimester depending on whether the women reported any *resistance exercise* at their visits in trimesters 2 and 3.

|             | Training reported in trimester 2 |             |          |                        | Training reported in trimester 3 |                    |             |                        |
|-------------|----------------------------------|-------------|----------|------------------------|----------------------------------|--------------------|-------------|------------------------|
|             | Yes                              | No          | <i>p</i> | <i>p<sup>adj</sup></i> | Yes                              | No                 | <i>p</i>    | <i>p<sup>adj</sup></i> |
| <i>NW</i>   | <i>n=50</i>                      | <i>n=84</i> |          |                        | <i>n=31</i>                      | <i>n=104</i>       |             |                        |
| Body Weight | 11.3 ± 3.1                       | 11.5 ± 2.7  | 0.77     | 0.64                   | <b>10.5 ± 3.1</b>                | <b>11.6 ± 2.8</b>  | <b>0.05</b> | <b>0.01</b>            |
| Fat Mass    | 4.5 ± 3.1                        | 4.7 ± 2.7   | 0.68     | 0.73                   | <b>3.6 ± 3.3</b>                 | <b>4.9 ± 2.6</b>   | <b>0.03</b> | <b>0.02</b>            |
| Leptin      | 7.3 ± 9.4                        | 7.0 ± 12.0  | 0.88     | 0.40                   | 5.3 ± 7.5                        | 7.8 ± 12.0         | 0.30        | 0.45                   |
| sOB-R       | 15.3 ± 17.8                      | 12.7 ± 13.2 | 0.44     | 0.22                   | <b>17.6 ± 18.9</b>               | <b>12.1 ± 13.3</b> | <b>0.13</b> | <b>0.02</b>            |
| Adiponectin | -5.5 ± 5.2                       | -2.7 ± 8.7  | 0.06     | 0.22                   | -4.8 ± 5.2                       | -3.4 ± 8.4         | 0.39        | 0.99                   |
| <i>OB</i>   | <i>n=9</i>                       | <i>n=41</i> |          |                        | <i>n=7</i>                       | <i>n=43</i>        |             |                        |
| Body Weight | 9.8 ± 2.7                        | 7.4 ± 4.5   | 0.14     | 0.29                   | 8.8 ± 2.9                        | 7.7 ± 4.5          | 0.52        | 0.47                   |
| Fat Mass    | 2.1 ± 3.5                        | 0.9 ± 3.8   | 0.43     | 0.17                   | 1.7 ± 3.6                        | 1.0 ± 3.8          | 0.64        | 0.10                   |
| Leptin      | 11.9 ± 10.5                      | 2.8 ± 15.9  | 0.18     | 0.15                   | 3.7 ± 9.2                        | 4.2 ± 16.1         | 0.95        | 0.96                   |
| sOB-R       | 13.7 ± 7.5                       | 8.9 ± 6.1   | 0.13     | 0.16                   | 16.4 ± 7.6                       | 8.9 ± 6.1          | 0.05        | 0.07                   |
| Adiponectin | -1.7 ± 1.8                       | -0.9 ± 4.6  | 0.66     | 0.64                   | -2.4 ± 2.0                       | -0.9 ± 4.4         | 0.51        | 0.60                   |

Significance determined with unadjusted t-test (*p*) or ANCOVA adjusted for age, BMI in trimester 1, parity and education (*p<sup>adj</sup>*). Δ denotes the gestational change from trimester 1 to trimester 3. \*sOB-R analysis was made on a subset of women; n= 84 for NW (n=37/47 for yes/no in trimester 2 and n=27/56 in trimester 3) and n=33 for OB (n=5/28 for yes/no in trimester 2 and n=3/30 in trimester 3). NW, women of normal weight; OB, women with obesity
